# Supplementary material for: Apolipoprotein E mediates cell resistance to influenza virus infection
Source: PubMed Central journal article supplement — Sci Adv. 2022 Sep 21;8(38):eabm6668. doi: 10.1126/sciadv.abm6668 (PMC9491715; doi:10.1126/sciadv.abm6668), 2022-09-21
Supplement: sciadv.abm6668_sm.pdf [file sciadv.abm6668_sm.pdf]

Supplementary Materials for  
**Apolipoprotein E mediates cell resistance to influenza virus infection**

Ping Gao *et al.*

Corresponding author: Jianwei Wang, [jianwei.wang@ipbcams.ac.cn](mailto:jianwei.wang@ipbcams.ac.cn); George Fu Gao, [gaof@im.ac.cn](mailto:gaof@im.ac.cn);  
Fuping Zhang, [zhangfp@im.ac.cn](mailto:zhangfp@im.ac.cn)

*Sci. Adv.* **8**, eabm6668 (2022)  
DOI: 10.1126/sciadv.abm6668

**This PDF file includes:**

Figs. S1 to S9  
Tables S1 to S4

Fig. S1

**A**

| Screen       | cells  | Strain | Identical                   |
|--------------|--------|--------|-----------------------------|
| Shapira 2009 | HBEC   | PR8    | STAT1,IFITM2, OAS1,IRF9     |
| Ward 2012    | HBEC30 | WSN    | IFITM1, IFITM3, IRF9, CYLC1 |
| Brass 2009   | U2OS   | PR8    | IFITM3                      |
| Su 2013      | A549   | WSN    | AXL                         |
| Karlas 2010  | A549   | WSN    | IRF2                        |

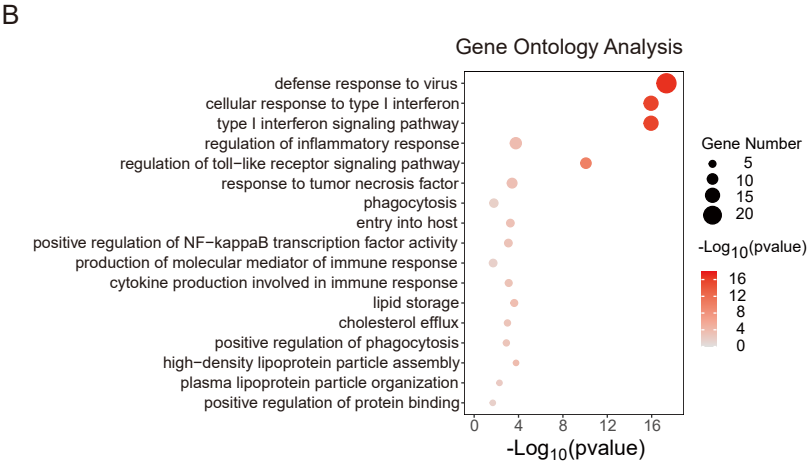

**Fig.S1. Identification of APOE as a factor that anti-IAV infection.**  
 (A) A comparison of genes identified in our screen with those obtained in other 5 published influenza genome-wide screens (miRNAs excluded).  
 (B) Enriched biological processes identified by Gene ontology analysis (miRNAs excluded).

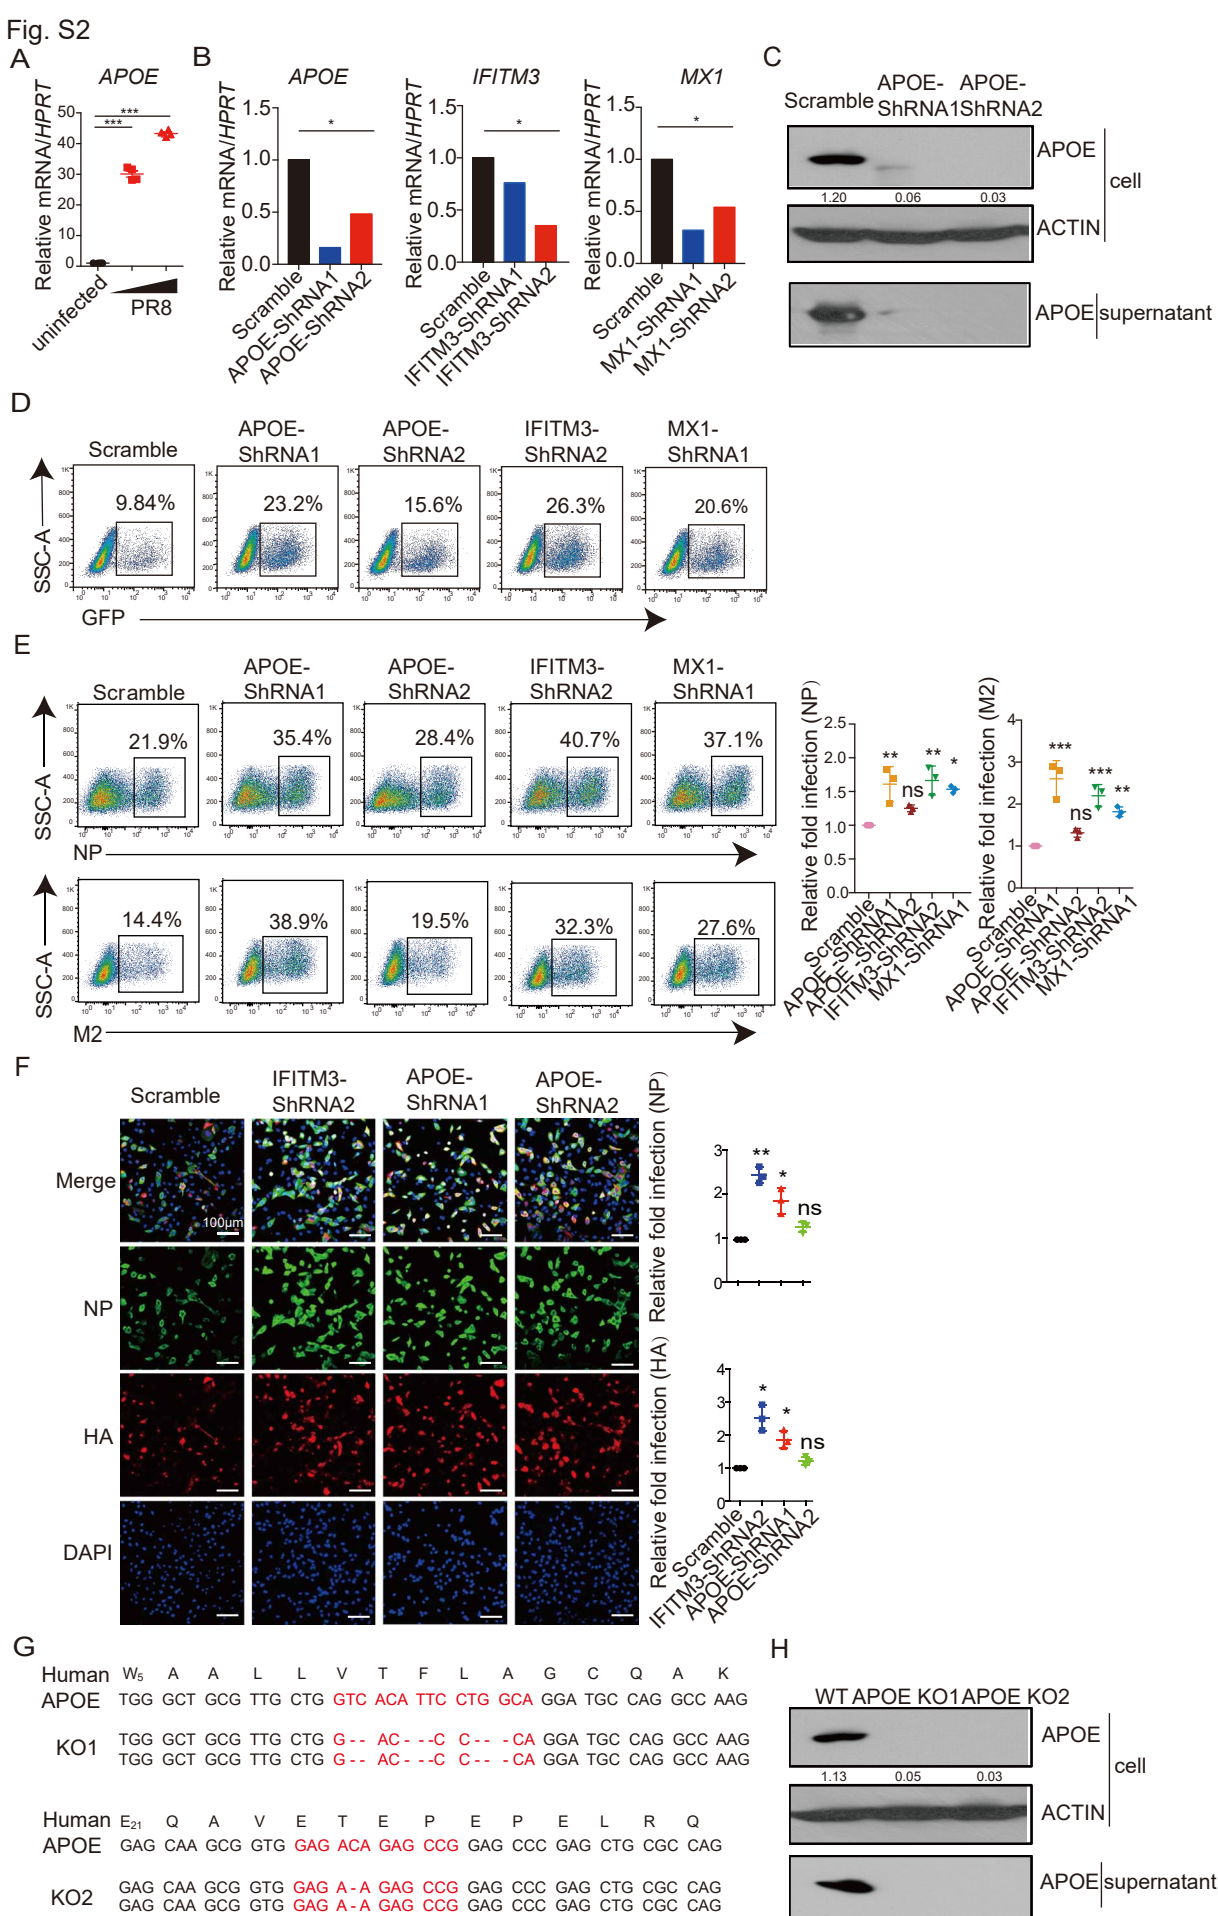

**Fig. S2 Validation of APOE as a factor that anti-IAV infection in A549 cells.**  
 (A) APOE expression in A549 cells was detected by qRT-PCR 12 hrs after PR8 infection. Data are shown as mean±SD from at least three independent experiments.  
 (B-C) Verification of APOE, IFITM3, MX1 gene knockdown efficiency by qRT-PCR (B) and western blot (C) in A549 cells. (D) A549 cells transduced with scramble shRNA or indicated gene shRNA were infected with PR8/NS1-GFP virus at MOI=0.3. GFP+ cells were assessed by flow cytometry 8 hrs after infection. The data presented are representative of at least three independent experiments. (E-F) A549 cells transduced with scramble shRNA or indicated gene shRNA were infected with PR8 at MOI=0.5. NP+ and M2+ cells were assessed by flow cytometry (E) or immunofluorescence microscopy (F) 12h after infection (left), relative fold infection normalized to non-targeting control from three independent experiments with standard deviation was statistically analyzed (right). Scale bar, 100µm. (G-H) APOE KO efficiency in A549 cells was analyzed by DNA sequencing (G) and western blot (H). P values were determined using Student's t-test. \*P < 0.05, \*\*P < 0.01, \*\*\*P < 0.001.

Fig. S3

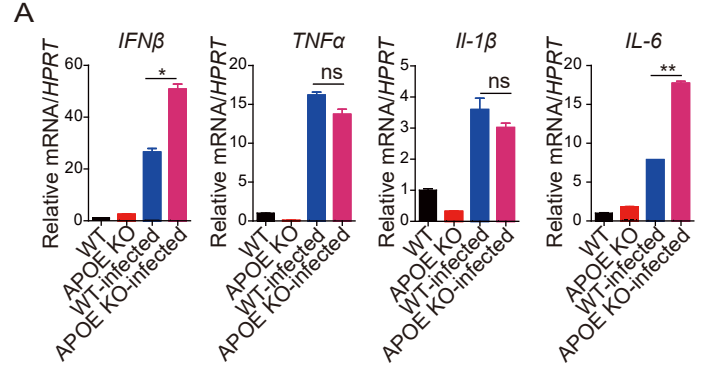

Fig. S3 Cytokine expression in WT and APOE KO A549 cells infected with PR8.  
(A) A549 WT and APOE KO cells were infected with PR8 at MOI=0.5 or not. The indicated cytokine expression was determined by qRT-PCR and normalized to housekeeping gene *HPRT*. P values were determined using two-way ANOVA followed by Bonferroni post hoc test. ns, not significant, \*P < 0.05, \*\*P < 0.01.

Fig. S4

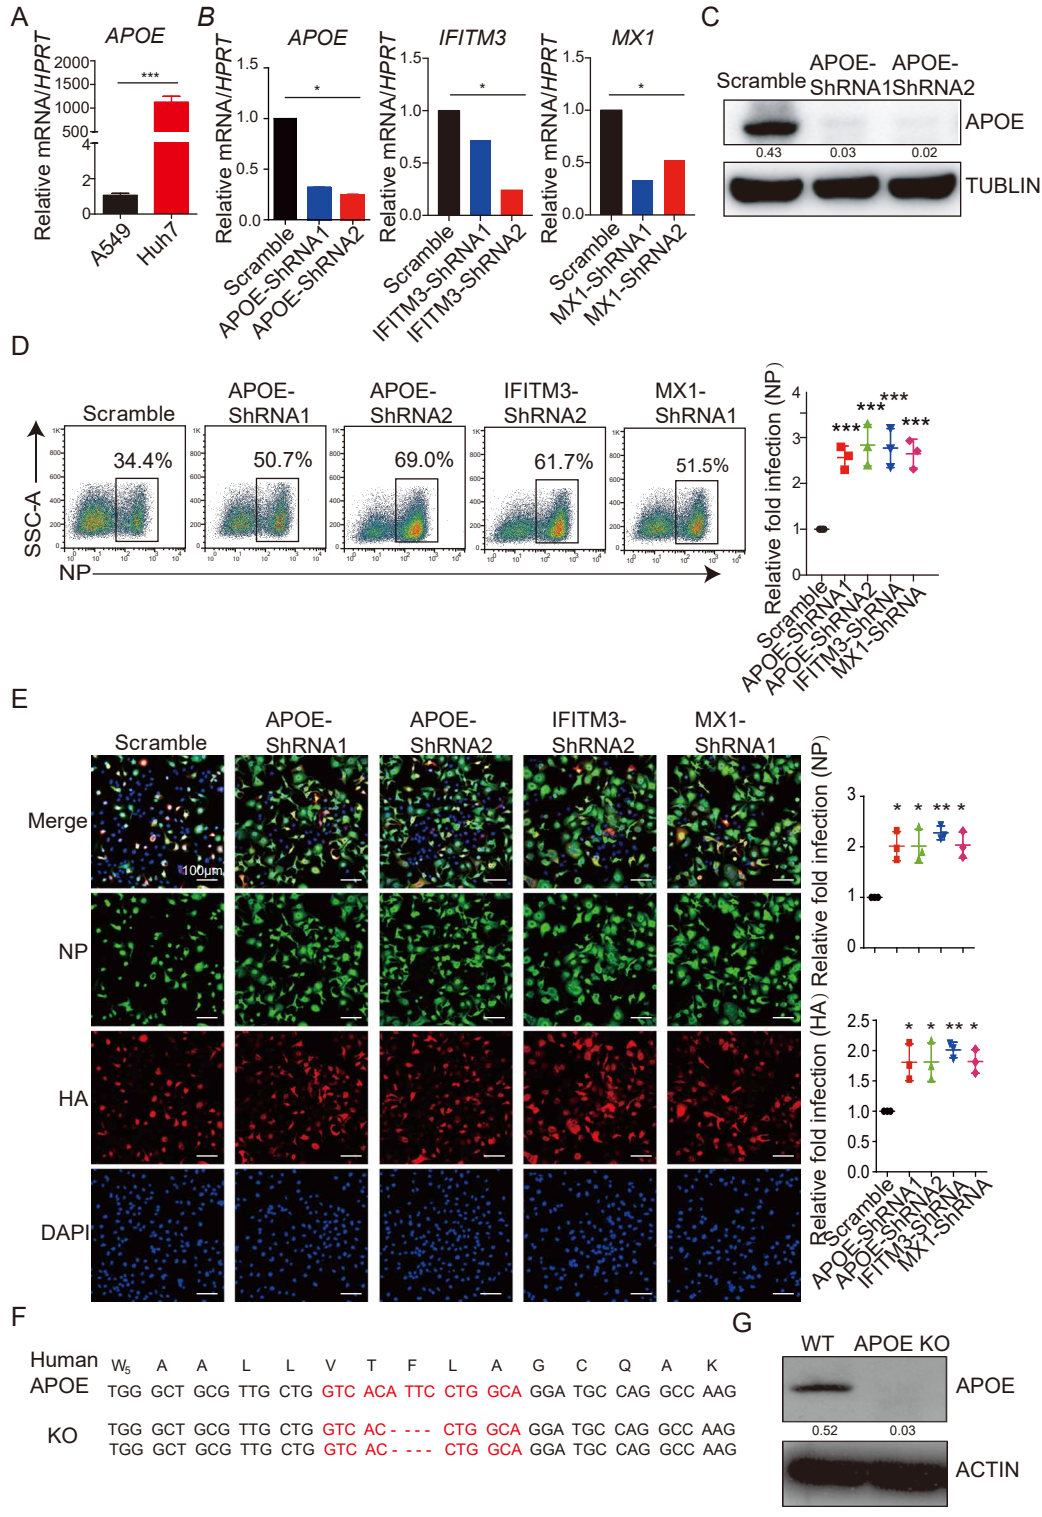

**Fig. S4 Validation of APOE as a factor that anti-IAV infection in Huh7 cells.**  
 (A) APOE expression in A549 and Huh7 cells was detected by qRT-PCR. (B-C) The knock-down efficiency of APOE, IFITM3, and MX1 in Huh7 cells was analyzed by qRT-PCR (B) and western blot (C). (D-E) Huh7 cells transduced with scramble shRNA or indicated gene shRNA were infected with PR8 at MOI=0.3. NP+ cells were assessed by flow cytometry (D) or immunofluorescence microscopy (E) 12h after infection (left), relative fold infection normalized to non-targeting control from three independent experiments with standard deviation was statistically analyzed (right). Scale bar, 100µm. (F-G) APOE KO efficiency in Huh7 cells was confirmed by DNA sequencing (F) and western blot (G). P values were determined using Student's t-test. \*P < 0.05, \*\*P < 0.01, \*\*\*P < 0.001.

Fig. S5

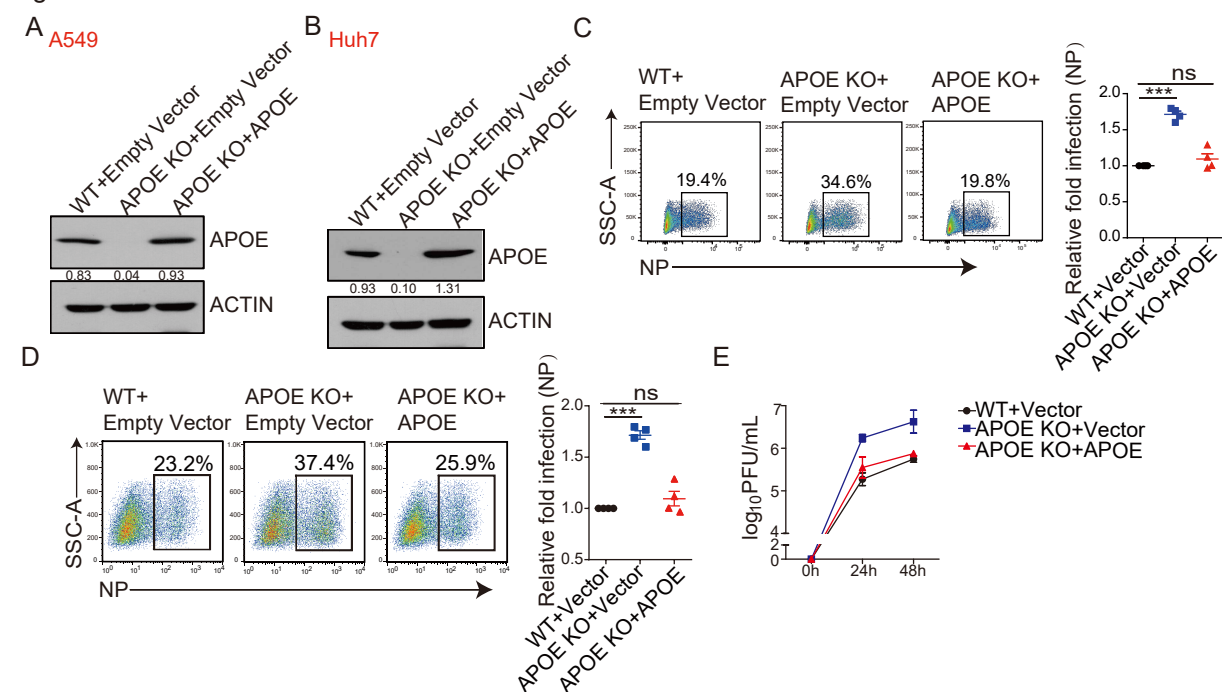

**Fig. S5 Overexpression APOE in APOE KO cells protect the cells from virus infection.** (A-B) APOE expression in APOE KO+APOE A549 cells (A) or Huh7 cells (B). The data presented are representative of at least three independent experiments. (C-D) A549 (C) and Huh7 (D) cells stably transduced with APOE or empty vector were infected with PR8 and NP+ cells were assessed 12 hrs after viral infection by flow cytometry (left). Relative fold infection from four independent experiments with standard deviation was statistically analyzed (right). (E) A549 cells as in (C) were infected with PR8 with low MOI=0.01, supernatant was collected to detect the virus titer by plaque assay. Data with mean  $\pm$  SD from three independent experiments was statistically analyzed. P values were determined using one-way ANOVA followed by Tukey's multiple-comparisons test. \*P < 0.05, \*\*P < 0.01, \*\*\*P < 0.001.

Fig. S6

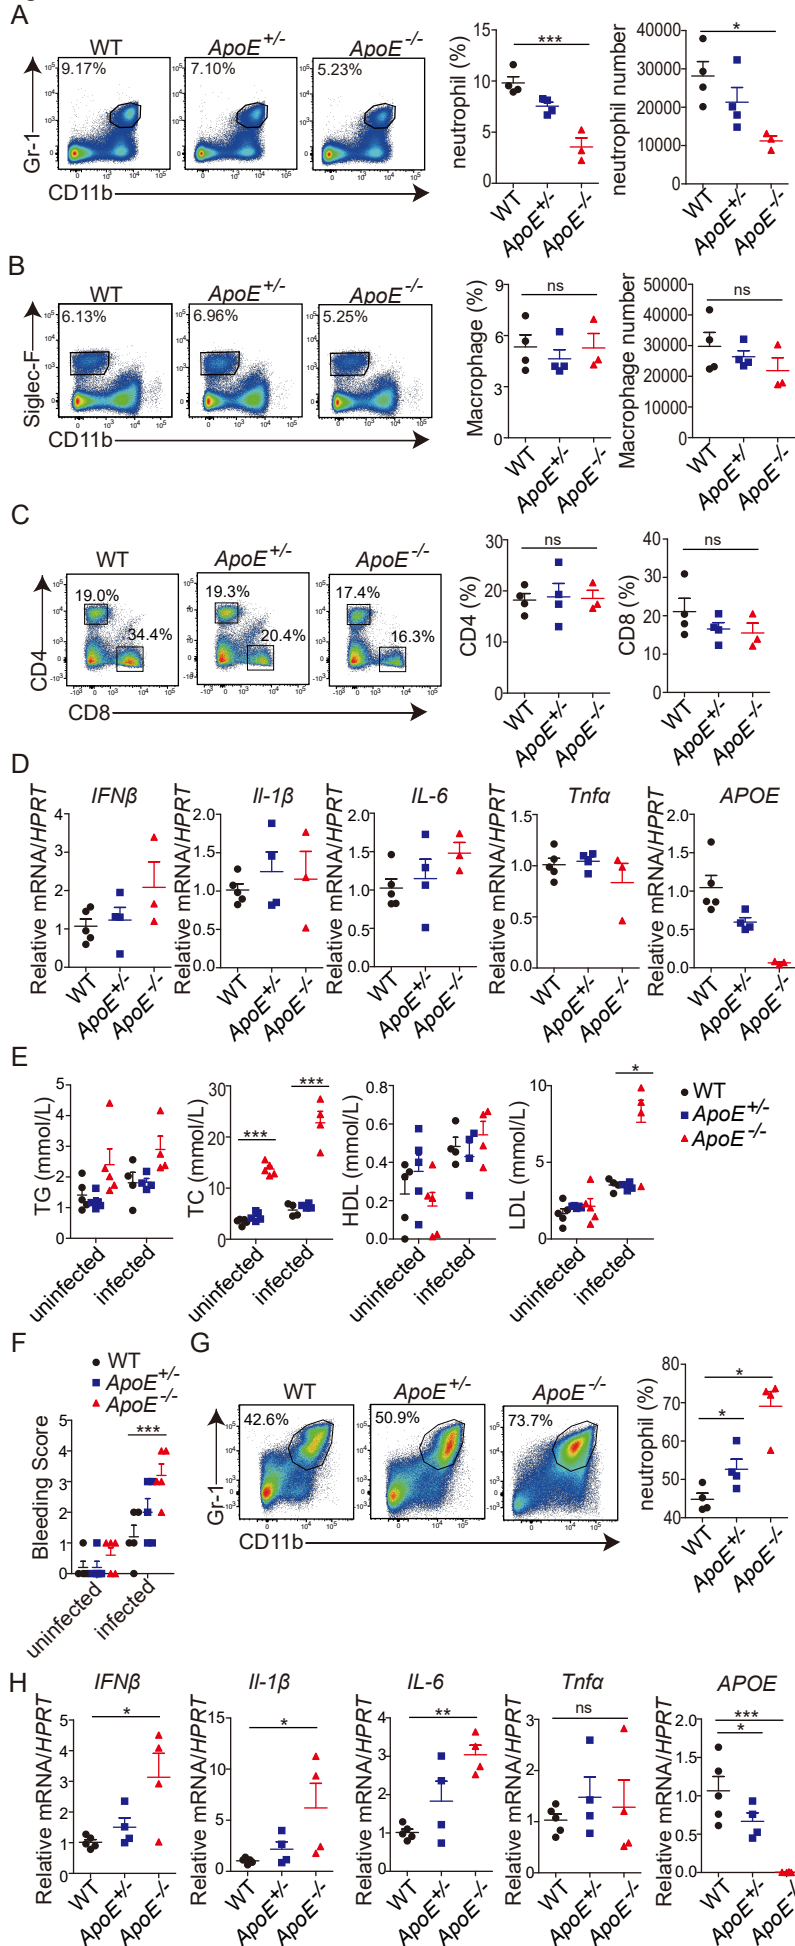

**Fig. S6 The increased inflammation in the APOE deficient mice infected with PR8.**  
 (A-C) The percentage and cell number of Neutrophil (A), Alveolar macrophage (B), CD4 and CD8 cells (C) in the lung of uninfected WT, *ApoE*<sup>+/-</sup> and *ApoE*<sup>-/-</sup> mice was analyzed by flow cytometry. Each dot represents data from one mouse.  
 (D) Cytokine expression in the lung of uninfected WT, *ApoE*<sup>+/-</sup> and *ApoE*<sup>-/-</sup> mice was detected by qRT-PCR. Each dot represents data from one mouse. (E) Triglycerideon (TG), cholesterol (TC), high-density lipoprotein (HDL), and low density lipoprotein (LDL) in serum of WT, *ApoE*<sup>+/-</sup> and *ApoE*<sup>-/-</sup> mice at baseline and 4 days after infection. Each dot represents data from one mouse. (F) Severity of bleeding was scored quantitatively from n = 5 mice per group. (G) WT, *ApoE*<sup>+/-</sup> and *ApoE*<sup>-/-</sup> mice were infected with 1000 pfu PR8, neutrophil infiltration of the lung at day 4 post infection were analysed by flow cytometry. (H) Cytokines and *APOE* expression in WT, *ApoE*<sup>+/-</sup> and *ApoE*<sup>-/-</sup> lungs at day 4 post infection were detected by qRT-PCR. Each dot represents data from one mouse. P values were determined using one-way ANOVA followed by Tukey's multiple-comparisons test. \*P < 0.05, \*\*P < 0.01, \*\*\*P < 0.001.

Fig. S7

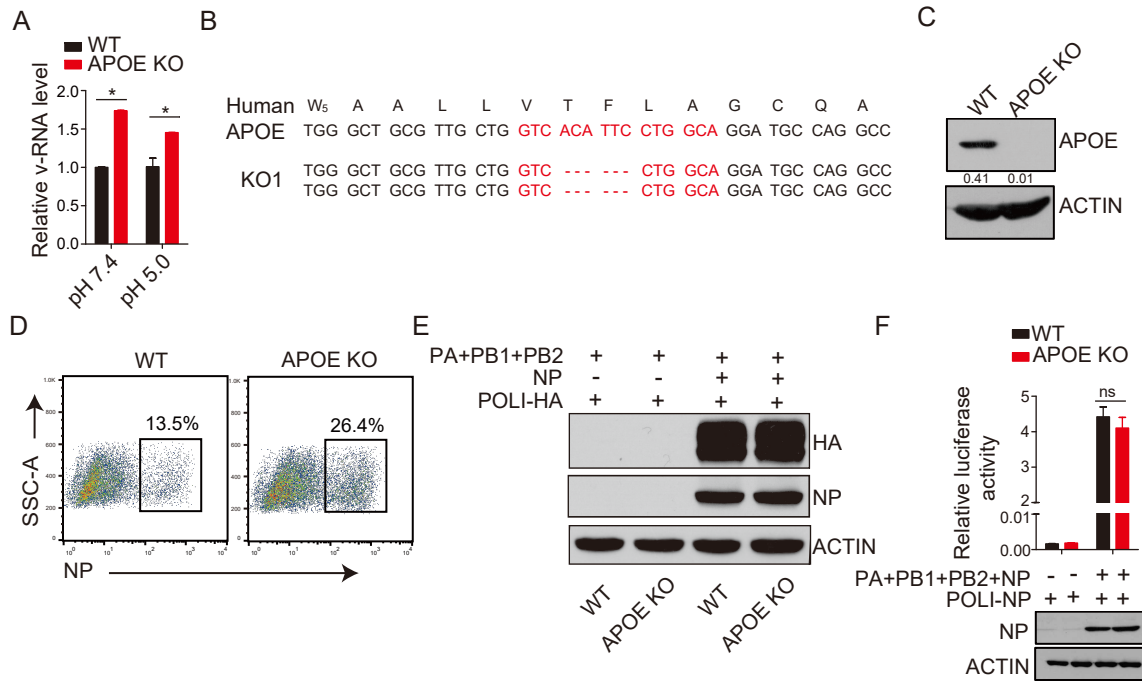

**Fig. S7 APOE deficiency affects viral entry but not RNA synthesis.**

(A) Viral fusion of WT and APOE KO A549 cells was analyzed by acid bypass assay. The relative v-RNA level from three independent experiments with standard deviation was statistically analyzed. (B-C) APOE KO efficiency in HEK293 cells was confirmed by DNA sequencing (B) and immunoblot (C). (D) NP+ cells in HEK293 WT and APOE KO cells were analyzed 12hrs after PR8 infection by flow cytometry. Data are representative of three independent experiments. (E) HEK293 WT and APOE KO cells were transfected with a POLI-driven RNA expression plasmid encoding the HA v-RNA segment and RNP expression plasmids pcDNA3.1-PB2, pcDNA3.1-PB1, pcDNA3.1-PA, and pcDNA3.1-NP. NP and HA were detected by western blot at 24 hrs post transfection. Data are representative of three independent experiments. (F) HEK293 WT and APOE KO cells were transfected with the luciferase reporter plasmid pPoNP-Luc and the internal control plasmid Renilla together with the plasmids pcDNA3.1-PB2, pcDNA3.1-PB1, pcDNA3.1-PA, and pcDNA3.1-NP. Cell lysates were analyzed 36 h after transfection to measure firefly and Renilla luciferase activities. Expression of NP and ACTIN was detected by immunoblot Blot. Data are representative of three independent experiments. P values were determined using two-way ANOVA followed by Bonferroni post hoc test. \*P < 0.05, \*\*P < 0.01, \*\*\*P < 0.001.



Fig. S8

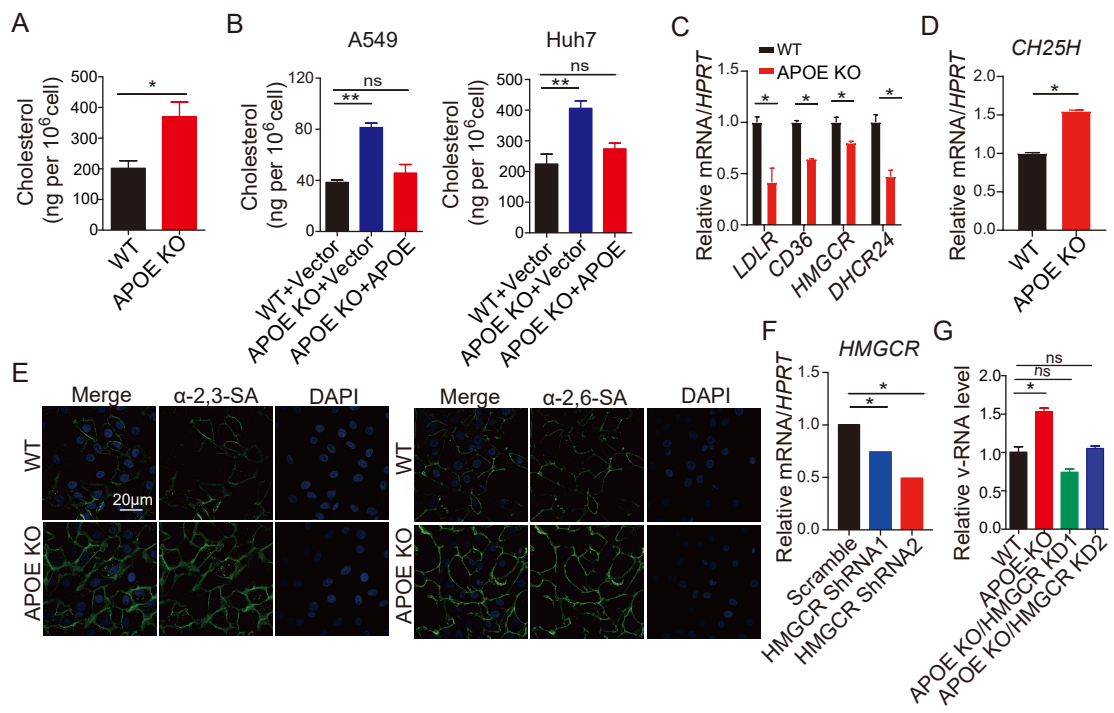

Fig. S8 APOE KO impacts cell cholesterol homeostasis.

(A) Total cellular cholesterol in WT or APOE KO Huh7 cells was detected by Amplex Red Cholesterol assay. Data are shown as mean±SD from at least three independent experiments. (B) Total cellular cholesterol in WT+Empty vector, APOE KO+Empty vector, and APOE KO+APOE cells was detected as in (A). Data are shown as mean±SD from at least three independent experiments. (C-D) Genes associated with cholesterol homeostasis (C) and *CH25H* (D) were detected by qRT-PCR in A549 WT and APOE KO cells. Data are shown as mean±SD from at least three independent experiments. (E) A549 WT and APOE KO cells were stained with α-2,3-linked SA or α-2,6-linked SA and detected by confocal microscopy, the low magnification microscopic images were shown here. Scale bar, 20 μm. (F) Knockdown efficiency of *HMGCR* in A549 cells was analyzed by qRT-PCR. Data are shown as mean±SD from at least three independent experiments. (G) Virus attachment in WT, APOE KO, and APOE KO/*HMGCR* KD cells was determined by qRT-PCR. The relative v-RNA level from three independent experiments with standard deviation was statistically analyzed. P values were determined using one-way ANOVA followed by Tukey's multiple-comparisons test. \*P < 0.05, \*\*P < 0.01, \*\*\*P < 0.001.

Fig. S9

A

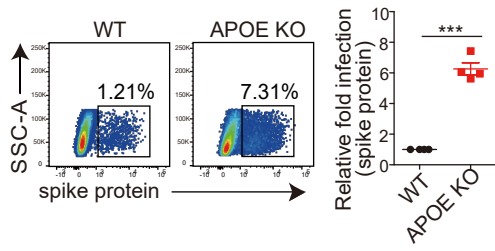

**Fig.S9. APOE Inhibits SARS-CoV-2 Infection.**

(A) Huh7 WT and APOE KO cells infected by SARS-CoV-2 at MOI=0.1 were collected 36hrs after infection and analyzed for spike protein-positive cells by flow cytometry (left), and relative fold infection from four independent experiments with standard deviation was statistically analyzed (right).

Supplementary Table 1

|              | log2FoldChange | pvalue      |
|--------------|----------------|-------------|
| ACTC1        | -1.797552593   | 0.000570226 |
| ACYP1        | 1.554569599    | 0.000872372 |
| AKIP1        | 1.594915054    | 0.000647535 |
| ALYREF       | 1.872154022    | 0.000537387 |
| Amn1         | 2.115297227    | 0.000116869 |
| APOA1        | 6.284104918    | 6.70E-132   |
| APOE         | 5.718443798    | 1.51E-97    |
| APPL2        | -3.450038548   | 3.92E-10    |
| ARL8B        | 1.695902801    | 3.49E-05    |
| ATP4B        | 1.57239887     | 0.000487702 |
| AXL          | 3.461125432    | 1.96E-29    |
| BCI10        | 2.981569753    | 5.29E-19    |
| BDP1         | -1.540731063   | 0.000947324 |
| BIRC3        | 2.772089825    | 4.89E-23    |
| BPIFB1       | 2.718087768    | 4.57E-21    |
| C10orf10     | -2.343643835   | 7.17E-07    |
| C11orf21     | -1.77915884    | 0.000374837 |
| C19orf59     | 1.643878779    | 0.000133049 |
| C1orf105     | 1.474711914    | 0.000337742 |
| C2orf44      | 1.475430362    | 0.000892304 |
| C8orf22      | 1.956746325    | 0.000280107 |
| CARD10       | -2.150679206   | 0.000486586 |
| CARD14       | -2.248769033   | 0.012098155 |
| CASP10       | 2.976705147    | 6.32E-12    |
| CCDC70       | 1.886043794    | 4.54E-05    |
| CENPN        | 1.513901598    | 7.95E-05    |
| CENPV        | -2.934925097   | 3.67E-05    |
| CGA          | 1.778969735    | 3.38E-06    |
| CHCHD1       | -1.924941268   | 0.001152745 |
| CHD4         | 1.656365571    | 0.001012869 |
| CPLX2        | 1.736979425    | 0.000730312 |
| CPNE4        | 1.667597511    | 6.77E-05    |
| CST5         | -1.604932698   | 4.50E-05    |
| CTDP1        | 1.694416322    | 0.000335591 |
| CX3CL1       | 3.40969897     | 2.68E-25    |
| CYB5R2       | 1.748793546    | 3.96E-07    |
| CYBA         | 3.232616689    | 5.43E-25    |
| CYLC1        | 1.820589141    | 6.18E-06    |
| CYP2C9       | -1.645351821   | 0.000489519 |
| DCTD         | 1.949684345    | 0.000659782 |
| DDX51        | -2.065656768   | 0.0007546   |
| DEFB129      | -1.69205116    | 0.001111124 |
| DIO3         | 1.688933337    | 0.000493911 |
| DPH5         | 1.353933115    | 0.00057607  |
| DYRK1B       | 1.476473935    | 0.000643555 |
| ERAL1        | -1.730214682   | 0.00025842  |
| FAM170A      | -1.794948274   | 0.001139334 |
| FBLN2        | 1.5330161      | 0.000438793 |
| FOCAD        | 1.428918663    | 0.000579582 |
| GPR89A       | 1.575906373    | 0.000363514 |
| GPR98        | 1.632730874    | 0.000271307 |
| GZMA         | 1.48494826     | 7.48E-05    |
| HFE          | 1.587833845    | 3.86E-05    |
| HMGN4        | 1.447276064    | 0.000882586 |
| hsa-let-7a-2 | 2.830615943    | 9.67E-08    |
| hsa-let-7a-3 | 2.42867971     | 8.98E-05    |

|                 |             |             |
|-----------------|-------------|-------------|
| hsa-let-7b      | 2.425355645 | 7.83E-05    |
| hsa-let-7f-1    | 3.065251664 | 5.80E-10    |
| hsa-let-7f-2    | 2.008455961 | 0.000520619 |
| hsa-mir-101-2   | 2.236830964 | 3.60E-07    |
| hsa-mir-103a-1  | 1.871434321 | 0.000122189 |
| hsa-mir-103a-2  | 1.948784472 | 1.44E-06    |
| hsa-mir-103b-2  | 1.948784472 | 1.44E-06    |
| hsa-mir-105-1   | 2.545550076 | 6.11E-05    |
| hsa-mir-10b     | 2.983285475 | 2.77E-08    |
| hsa-mir-1-1     | 1.98232726  | 4.42E-05    |
| hsa-mir-1182    | 2.135958418 | 1.43E-06    |
| hsa-mir-1-2     | 2.222339609 | 0.000183479 |
| hsa-mir-1204    | 1.686180005 | 0.000454321 |
| hsa-mir-124-1   | 2.070117963 | 9.07E-05    |
| hsa-mir-124-3   | 1.977818351 | 4.21E-05    |
| hsa-mir-1244-2  | 1.678511635 | 0.000217186 |
| hsa-mir-1250    | 2.506162764 | 1.15E-05    |
| hsa-mir-1253    | 1.982528211 | 1.78E-05    |
| hsa-mir-1255b-1 | 2.761009949 | 0.000610677 |
| hsa-mir-125a    | 2.421995533 | 3.84E-06    |
| hsa-mir-1262    | 2.281538802 | 4.57E-08    |
| hsa-mir-1265    | 1.780958972 | 2.71E-05    |
| hsa-mir-1267    | 2.172433474 | 0.000191632 |
| hsa-mir-1268b   | 2.141692984 | 0.000350255 |
| hsa-mir-1269a   | 2.000917803 | 0.000331606 |
| hsa-mir-127     | 2.301899525 | 5.08E-05    |
| hsa-mir-1270-1  | 1.435139948 | 0.000353742 |
| hsa-mir-1270-2  | 1.435139948 | 0.000353742 |
| hsa-mir-1273g   | 2.038201901 | 2.96E-05    |
| hsa-mir-1276    | 2.147365316 | 9.96E-05    |
| hsa-mir-1283-1  | 2.2060638   | 0.000101849 |
| hsa-mir-1285-2  | 1.973287292 | 7.87E-05    |
| hsa-mir-1286    | 2.217421681 | 0.000178334 |
| hsa-mir-1287    | 2.488109131 | 4.24E-07    |
| hsa-mir-1290    | 2.692135215 | 1.07E-06    |
| hsa-mir-1294    | 1.877438711 | 2.62E-05    |
| hsa-mir-1295a   | 1.675332553 | 4.27E-05    |
| hsa-mir-1295b   | 1.675332553 | 4.27E-05    |
| hsa-mir-1299    | 2.356521753 | 1.78E-05    |
| hsa-mir-1302-1  | 2.373938617 | 0.000287608 |
| hsa-mir-1302-10 | 1.644360976 | 1.00E-05    |
| hsa-mir-1302-11 | 1.644360976 | 1.00E-05    |
| hsa-mir-1302-2  | 1.644360976 | 1.00E-05    |
| hsa-mir-1302-5  | 1.944623175 | 0.000334034 |
| hsa-mir-1303    | 2.397284808 | 6.22E-05    |
| hsa-mir-1306    | 2.759280871 | 1.08E-07    |
| hsa-mir-1307    | 2.470527402 | 5.33E-07    |
| hsa-mir-1324    | 1.962393477 | 1.00E-05    |
| hsa-mir-1343    | 2.353190019 | 0.000497238 |
| hsa-mir-138-1   | 1.873213076 | 6.68E-05    |
| hsa-mir-139     | 1.832775678 | 0.000377666 |
| hsa-mir-141     | 2.259374508 | 2.43E-06    |
| hsa-mir-142     | 2.631419354 | 7.96E-07    |
| hsa-mir-144     | 2.519877849 | 0.000918935 |
| hsa-mir-148a    | 2.892762937 | 8.40E-07    |
| hsa-mir-151a    | 1.940220964 | 0.000290071 |
| hsa-mir-155     | 2.347763004 | 9.01E-05    |
| hsa-mir-1587    | 2.1694265   | 0.000637809 |

|                |             |             |
|----------------|-------------|-------------|
| hsa-mir-16-1   | 1.847273055 | 0.000521132 |
| hsa-mir-16-2   | 2.316959441 | 3.36E-06    |
| hsa-mir-181a-2 | 2.990373918 | 5.78E-09    |
| hsa-mir-181b-2 | 2.303516073 | 0.000171163 |
| hsa-mir-183    | 1.62143178  | 0.000993828 |
| hsa-mir-184    | 2.98461897  | 4.72E-07    |
| hsa-mir-185    | 2.099059613 | 8.94E-05    |
| hsa-mir-188    | 2.800226149 | 1.37E-09    |
| hsa-mir-191    | 2.356817043 | 2.43E-06    |
| hsa-mir-1911   | 2.473865479 | 2.45E-09    |
| hsa-mir-1913   | 2.027290098 | 0.000939066 |
| hsa-mir-1972-1 | 1.671181102 | 0.000591188 |
| hsa-mir-1972-2 | 2.149819129 | 4.99E-06    |
| hsa-mir-199a-1 | 2.970412758 | 3.48E-07    |
| hsa-mir-199a-2 | 2.325487105 | 2.37E-05    |
| hsa-mir-200a   | 2.434423803 | 9.40E-07    |
| hsa-mir-200b   | 2.395304258 | 5.15E-06    |
| hsa-mir-203a   | 2.400542148 | 1.03E-05    |
| hsa-mir-205    | 2.046069249 | 6.25E-06    |
| hsa-mir-20b    | 2.145911807 | 9.07E-07    |
| hsa-mir-2113   | 2.149169931 | 0.000884389 |
| hsa-mir-216b   | 1.984095924 | 0.000382244 |
| hsa-mir-218-2  | 2.410025479 | 0.000329634 |
| hsa-mir-219a-2 | 2.579121492 | 1.34E-05    |
| hsa-mir-22     | 1.791044437 | 0.00099149  |
| hsa-mir-2276   | 2.309907364 | 0.00024671  |
| hsa-mir-2277   | 1.825001967 | 9.73E-05    |
| hsa-mir-23a    | 2.051587011 | 0.000269113 |
| hsa-mir-23c    | 1.922090637 | 0.00055853  |
| hsa-mir-28     | 2.59225994  | 2.43E-05    |
| hsa-mir-29c    | 2.41814841  | 6.91E-07    |
| hsa-mir-300    | 2.43295274  | 4.80E-08    |
| hsa-mir-301b   | 2.43921575  | 6.98E-06    |
| hsa-mir-302a   | 2.999811521 | 4.63E-06    |
| hsa-mir-30a    | 1.497964589 | 0.000887093 |
| hsa-mir-30c-1  | 2.166701898 | 0.000159422 |
| hsa-mir-30d    | 2.023800755 | 0.000604055 |
| hsa-mir-3115   | 2.177237113 | 0.000271432 |
| hsa-mir-3116-1 | 1.778071428 | 1.18E-05    |
| hsa-mir-3116-2 | 1.778071428 | 1.18E-05    |
| hsa-mir-3128   | 2.137201492 | 4.02E-05    |
| hsa-mir-3130-1 | 1.720841131 | 0.000315831 |
| hsa-mir-3130-2 | 1.720841131 | 0.000315831 |
| hsa-mir-3144   | 1.801011474 | 0.000228558 |
| hsa-mir-3150a  | 1.921289882 | 0.000537262 |
| hsa-mir-3150b  | 1.921289882 | 0.000537262 |
| hsa-mir-3152   | 1.773947864 | 0.000195737 |
| hsa-mir-3153   | 2.514964124 | 0.000368139 |
| hsa-mir-3163   | 2.464640923 | 5.68E-06    |
| hsa-mir-3183   | 1.724795677 | 0.000220628 |
| hsa-mir-3187   | 2.114011649 | 0.000740057 |
| hsa-mir-3190   | 1.900289684 | 3.22E-06    |
| hsa-mir-3191   | 1.900289684 | 3.22E-06    |
| hsa-mir-3198-2 | 3.821578227 | 1.59E-08    |
| hsa-mir-325    | 2.195261659 | 5.12E-05    |
| hsa-mir-326    | 2.050394908 | 5.72E-06    |
| hsa-mir-331    | 1.699682769 | 0.000625704 |
| hsa-mir-345    | 2.202443181 | 0.00013176  |

|                 |             |             |
|-----------------|-------------|-------------|
| hsa-mir-3609    | 2.165725545 | 5.40E-06    |
| hsa-mir-3611    | 3.025857255 | 0.000193785 |
| hsa-mir-3614    | 2.348750667 | 0.000161927 |
| hsa-mir-3616    | 2.681359823 | 0.000411688 |
| hsa-mir-3618    | 2.331533029 | 8.35E-07    |
| hsa-mir-362     | 1.634155404 | 0.000195619 |
| hsa-mir-3650    | 3.544393951 | 1.17E-11    |
| hsa-mir-3657    | 2.096099525 | 6.45E-05    |
| hsa-mir-3658    | 1.842410533 | 0.000228723 |
| hsa-mir-3664    | 2.197048908 | 1.80E-06    |
| hsa-mir-3666    | 2.085061629 | 0.00069809  |
| hsa-mir-367     | 2.107688748 | 0.000490903 |
| hsa-mir-3674    | 2.037878203 | 3.15E-05    |
| hsa-mir-3675    | 1.7655961   | 0.000362702 |
| hsa-mir-3682    | 2.535677264 | 4.69E-06    |
| hsa-mir-3684    | 1.716014898 | 0.00051134  |
| hsa-mir-3685    | 1.934074198 | 6.25E-05    |
| hsa-mir-3689a   | 1.879721319 | 4.96E-08    |
| hsa-mir-3689b   | 1.75676411  | 0.000344898 |
| hsa-mir-3689c   | 2.026023591 | 8.38E-08    |
| hsa-mir-3689d-1 | 2.366280303 | 4.59E-06    |
| hsa-mir-3692    | 1.870546619 | 0.000232634 |
| hsa-mir-371a    | 2.411708534 | 9.26E-13    |
| hsa-mir-371b    | 2.202990456 | 9.20E-11    |
| hsa-mir-374a    | 2.221151575 | 0.000114816 |
| hsa-mir-375     | 2.328572245 | 6.29E-06    |
| hsa-mir-378d-2  | 2.051705246 | 2.21E-05    |
| hsa-mir-378g    | 2.268754783 | 0.000264042 |
| hsa-mir-378i    | 2.072348114 | 0.000225221 |
| hsa-mir-383     | 1.737712665 | 0.000139369 |
| hsa-mir-3910-1  | 1.679115101 | 1.70E-07    |
| hsa-mir-3910-2  | 1.679115101 | 1.70E-07    |
| hsa-mir-3916    | 2.560463603 | 7.38E-10    |
| hsa-mir-3925    | 3.015455856 | 0.000789886 |
| hsa-mir-3926-1  | 1.665142056 | 1.42E-05    |
| hsa-mir-3926-2  | 1.600303332 | 4.72E-05    |
| hsa-mir-3934    | 1.904317474 | 0.000992328 |
| hsa-mir-3936    | 1.908576024 | 0.000442151 |
| hsa-mir-3941    | 2.19426283  | 3.35E-05    |
| hsa-mir-409     | 2.007910933 | 5.22E-06    |
| hsa-mir-411     | 2.659762877 | 1.44E-09    |
| hsa-mir-4258    | 1.944510442 | 7.41E-05    |
| hsa-mir-4264    | 2.785464083 | 0.000286644 |
| hsa-mir-4265    | 2.128169599 | 2.37E-05    |
| hsa-mir-4269    | 2.026794521 | 4.37E-05    |
| hsa-mir-4273    | 1.94404216  | 4.90E-05    |
| hsa-mir-4278    | 2.020500134 | 7.50E-05    |
| hsa-mir-4290    | 1.845827311 | 3.02E-05    |
| hsa-mir-4298    | 2.341744927 | 3.54E-07    |
| hsa-mir-4299    | 2.371142926 | 0.000341294 |
| hsa-mir-4302    | 1.967790955 | 9.96E-06    |
| hsa-mir-4308    | 3.059888782 | 2.67E-07    |
| hsa-mir-4325    | 2.100739832 | 1.41E-05    |
| hsa-mir-4327    | 1.927869031 | 0.000974728 |
| hsa-mir-4328    | 1.614147154 | 0.001089243 |
| hsa-mir-4422    | 2.818096024 | 2.95E-06    |
| hsa-mir-4431    | 2.636765004 | 1.50E-07    |
| hsa-mir-4435-1  | 2.173326851 | 0.000557726 |

|                 |             |             |
|-----------------|-------------|-------------|
| hsa-mir-4435-2  | 2.772323207 | 1.55E-07    |
| hsa-mir-4436b-1 | 2.249723748 | 0.000237772 |
| hsa-mir-4438    | 1.874264763 | 0.000667947 |
| hsa-mir-4444-1  | 1.988429301 | 8.02E-06    |
| hsa-mir-4444-2  | 1.988429301 | 8.02E-06    |
| hsa-mir-4456    | 2.716379703 | 6.84E-08    |
| hsa-mir-4462    | 2.482405039 | 1.77E-05    |
| hsa-mir-4465    | 1.880051149 | 0.000425154 |
| hsa-mir-4467    | 2.95251586  | 3.65E-05    |
| hsa-mir-4470    | 2.075647405 | 5.71E-05    |
| hsa-mir-4496    | 2.076356477 | 1.44E-05    |
| hsa-mir-449a    | 1.895065986 | 0.000475069 |
| hsa-mir-4500    | 2.459952241 | 1.43E-06    |
| hsa-mir-4514    | 3.304397796 | 2.04E-08    |
| hsa-mir-4518    | 3.046018056 | 3.07E-08    |
| hsa-mir-451a    | 1.704373047 | 9.12E-05    |
| hsa-mir-451b    | 1.704373047 | 9.12E-05    |
| hsa-mir-452     | 2.090680596 | 0.000483894 |
| hsa-mir-4522    | 2.569931586 | 2.27E-07    |
| hsa-mir-4531    | 3.920034912 | 3.45E-08    |
| hsa-mir-4537    | 2.501469024 | 5.82E-07    |
| hsa-mir-4634    | 2.605866941 | 8.63E-05    |
| hsa-mir-4635    | 1.951773897 | 4.72E-05    |
| hsa-mir-4650-1  | 1.929022319 | 0.00058158  |
| hsa-mir-4654    | 2.140631035 | 2.00E-05    |
| hsa-mir-4656    | 1.835119255 | 0.000256873 |
| hsa-mir-4662a   | 1.724404721 | 0.000136226 |
| hsa-mir-4662b   | 2.11860719  | 9.36E-05    |
| hsa-mir-4663    | 2.40414997  | 3.06E-05    |
| hsa-mir-4665    | 2.644168978 | 6.70E-05    |
| hsa-mir-4675    | 2.226185828 | 0.000206709 |
| hsa-mir-4684    | 1.81925599  | 0.000486133 |
| hsa-mir-4687    | 2.197233961 | 5.39E-05    |
| hsa-mir-4693    | 2.919268707 | 2.00E-06    |
| hsa-mir-4700    | 1.811655653 | 0.000122131 |
| hsa-mir-4705    | 1.81407405  | 0.000209241 |
| hsa-mir-4706    | 2.562903304 | 0.000520492 |
| hsa-mir-4709    | 2.085961824 | 5.78E-05    |
| hsa-mir-4713    | 1.804475094 | 0.00083318  |
| hsa-mir-4715    | 2.078405618 | 0.000347845 |
| hsa-mir-4723    | 1.909506997 | 8.33E-06    |
| hsa-mir-4730    | 1.663529011 | 0.001214524 |
| hsa-mir-4732    | 2.732115844 | 9.29E-05    |
| hsa-mir-4736    | 3.639217617 | 2.96E-08    |
| hsa-mir-4737    | 1.865659322 | 3.61E-05    |
| hsa-mir-4738    | 1.864137888 | 0.000501399 |
| hsa-mir-4742    | 2.068231976 | 2.58E-06    |
| hsa-mir-4747    | 3.093604832 | 0.00019369  |
| hsa-mir-4762    | 2.408753148 | 2.09E-06    |
| hsa-mir-4764    | 2.104306915 | 1.44E-05    |
| hsa-mir-4767    | 2.049474528 | 0.000457446 |
| hsa-mir-4768    | 2.484502921 | 3.72E-08    |
| hsa-mir-4771-1  | 1.798309681 | 0.000125037 |
| hsa-mir-4773-1  | 2.022802579 | 0.000283058 |
| hsa-mir-4773-2  | 2.022802579 | 0.000283058 |
| hsa-mir-4774    | 2.244741558 | 0.000663409 |
| hsa-mir-4777    | 2.261496688 | 0.000183443 |
| hsa-mir-4786    | 2.424387479 | 0.000133422 |

|                 |             |             |
|-----------------|-------------|-------------|
| hsa-mir-4791    | 2.482083414 | 6.31E-05    |
| hsa-mir-4796    | 1.75492192  | 0.000147969 |
| hsa-mir-4798    | 1.569336063 | 0.000761796 |
| hsa-mir-488     | 2.181577453 | 7.92E-05    |
| hsa-mir-489     | 2.236218943 | 0.000165308 |
| hsa-mir-492     | 2.963350504 | 2.62E-07    |
| hsa-mir-499a    | 2.040899432 | 9.44E-07    |
| hsa-mir-5003    | 1.774897979 | 0.000941288 |
| hsa-mir-5004    | 2.930691848 | 3.50E-08    |
| hsa-mir-500b    | 1.859832814 | 0.001012424 |
| hsa-mir-5011    | 1.744009375 | 0.000148942 |
| hsa-mir-503     | 2.292401361 | 5.32E-09    |
| hsa-mir-505     | 2.162785721 | 0.000364248 |
| hsa-mir-506     | 1.840373878 | 0.000364144 |
| hsa-mir-5089    | 3.172551724 | 0.000700467 |
| hsa-mir-509-1   | 1.529913581 | 0.000845571 |
| hsa-mir-509-2   | 1.529913581 | 0.000845571 |
| hsa-mir-5094    | 2.084663204 | 0.000159657 |
| hsa-mir-512-1   | 1.732179873 | 5.75E-06    |
| hsa-mir-512-2   | 1.732179873 | 5.75E-06    |
| hsa-mir-515-1   | 1.997925826 | 2.70E-07    |
| hsa-mir-515-2   | 1.997925826 | 2.70E-07    |
| hsa-mir-516b-2  | 1.666579062 | 0.000365229 |
| hsa-mir-517a    | 1.542844698 | 0.001164207 |
| hsa-mir-5189    | 1.84581678  | 0.001207206 |
| hsa-mir-518b    | 1.903189896 | 0.000800879 |
| hsa-mir-5197    | 1.831856497 | 0.000202646 |
| hsa-mir-519d    | 1.95468492  | 0.000184993 |
| hsa-mir-519e    | 1.775548927 | 0.000473696 |
| hsa-mir-520b    | 1.691207347 | 0.000118302 |
| hsa-mir-520f    | 1.648968719 | 0.000789795 |
| hsa-mir-520g    | 1.618790335 | 4.70E-05    |
| hsa-mir-520h    | 1.489841803 | 0.000224604 |
| hsa-mir-525     | 1.83513457  | 0.000773593 |
| hsa-mir-526a-1  | 1.88452407  | 6.62E-05    |
| hsa-mir-526a-2  | 1.718425568 | 6.52E-05    |
| hsa-mir-548a-2  | 2.308975498 | 9.63E-07    |
| hsa-mir-548ae-2 | 2.262627482 | 1.43E-05    |
| hsa-mir-548ag-1 | 2.065228627 | 0.000165001 |
| hsa-mir-548ap   | 1.949100294 | 1.11E-07    |
| hsa-mir-548at   | 1.892439961 | 0.001039859 |
| hsa-mir-548au   | 2.528103256 | 3.21E-05    |
| hsa-mir-548av   | 2.014710375 | 0.000347169 |
| hsa-mir-548aw   | 2.203112799 | 8.73E-05    |
| hsa-mir-548az   | 2.821424247 | 8.41E-07    |
| hsa-mir-548c    | 1.849708266 | 1.86E-07    |
| hsa-mir-548n    | 1.926201819 | 8.21E-05    |
| hsa-mir-548s    | 2.621209971 | 4.56E-10    |
| hsa-mir-548t    | 1.611128141 | 0.000779127 |
| hsa-mir-548v    | 3.129901019 | 9.16E-05    |
| hsa-mir-548w    | 1.950761827 | 1.06E-05    |
| hsa-mir-548y    | 2.197061701 | 9.55E-05    |
| hsa-mir-548z    | 1.849708266 | 1.86E-07    |
| hsa-mir-550a-1  | 1.640914859 | 1.10E-06    |
| hsa-mir-550a-2  | 1.50573184  | 4.90E-05    |
| hsa-mir-550b-1  | 1.640914859 | 1.10E-06    |
| hsa-mir-550b-2  | 1.50573184  | 4.90E-05    |
| hsa-mir-551a    | 2.127221182 | 0.000547767 |



|                 |             |             |
|-----------------|-------------|-------------|
| hsa-mir-556     | 2.993638191 | 6.13E-08    |
| hsa-mir-5572    | 2.306016    | 2.17E-06    |
| hsa-mir-5579    | 2.186014112 | 0.000928432 |
| hsa-mir-5584    | 2.269197705 | 1.95E-08    |
| hsa-mir-5587    | 2.278196484 | 0.000384245 |
| hsa-mir-5680    | 2.270316928 | 2.43E-05    |
| hsa-mir-5683    | 1.867271909 | 0.000670168 |
| hsa-mir-5684    | 2.405476164 | 2.07E-06    |
| hsa-mir-5688    | 1.754589847 | 0.000829096 |
| hsa-mir-5691    | 2.038341515 | 6.17E-05    |
| hsa-mir-5692c-1 | 2.389999811 | 0.000671696 |
| hsa-mir-5694    | 2.289432876 | 2.59E-06    |
| hsa-mir-5695    | 2.431858009 | 2.19E-05    |
| hsa-mir-5696    | 2.107330486 | 1.73E-05    |
| hsa-mir-5697    | 2.060649325 | 4.39E-05    |
| hsa-mir-5704    | 1.715046106 | 0.00049774  |
| hsa-mir-575     | 2.434181039 | 0.000536822 |
| hsa-mir-580     | 2.083640182 | 0.000195999 |
| hsa-mir-583     | 1.889670694 | 0.000671224 |
| hsa-mir-584     | 2.069179378 | 0.000571325 |
| hsa-mir-585     | 2.135648888 | 0.00032423  |
| hsa-mir-586     | 2.159285409 | 0.000292152 |
| hsa-mir-587     | 1.935472276 | 0.000860231 |
| hsa-mir-593     | 3.323148369 | 0.000586701 |
| hsa-mir-597     | 1.979714745 | 9.44E-05    |
| hsa-mir-603     | 1.985416015 | 0.00014169  |
| hsa-mir-605     | 2.358360297 | 5.65E-06    |
| hsa-mir-6071    | 2.277366019 | 2.79E-05    |
| hsa-mir-6073    | 2.013945528 | 0.001041369 |
| hsa-mir-6075    | 2.187544653 | 0.000414819 |
| hsa-mir-6082    | 2.030838764 | 0.000489843 |
| hsa-mir-6089-1  | 2.130856743 | 6.10E-06    |
| hsa-mir-6089-2  | 2.130856743 | 6.10E-06    |
| hsa-mir-609     | 2.081808053 | 2.74E-05    |
| hsa-mir-615     | 3.048172663 | 1.23E-06    |
| hsa-mir-6165    | 3.13969952  | 1.81E-07    |
| hsa-mir-629     | 5.308619557 | 1.15E-06    |
| hsa-mir-641     | 2.392624037 | 6.42E-05    |
| hsa-mir-642a    | 1.446191213 | 0.000308557 |
| hsa-mir-642b    | 1.498293321 | 0.000280801 |
| hsa-mir-646     | 2.275104022 | 0.000246847 |
| hsa-mir-647     | 1.698260946 | 0.000659646 |
| hsa-mir-6501    | 2.876264831 | 0.000305385 |
| hsa-mir-6503    | 2.769381677 | 0.000260761 |
| hsa-mir-6504    | 2.721830244 | 1.20E-08    |
| hsa-mir-6505    | 1.887851897 | 0.000232118 |
| hsa-mir-6513    | 2.235217102 | 8.56E-05    |
| hsa-mir-6514    | 2.275719293 | 3.06E-06    |
| hsa-mir-6516    | 2.087574747 | 0.000748601 |
| hsa-mir-652     | 2.304263569 | 2.72E-05    |
| hsa-mir-653     | 2.227598461 | 0.000100116 |
| hsa-mir-663a    | 2.856219349 | 3.08E-07    |
| hsa-mir-664a    | 1.991087588 | 1.85E-05    |
| hsa-mir-665     | 2.531661484 | 2.76E-06    |
| hsa-mir-6717    | 2.05635005  | 0.000930379 |
| hsa-mir-6718    | 2.393738388 | 1.14E-05    |
| hsa-mir-6723    | 1.97736799  | 0.00017642  |
| hsa-mir-6735    | 3.053325166 | 1.44E-07    |

|                |             |             |
|----------------|-------------|-------------|
| hsa-mir-6751   | 1.885771746 | 0.001110045 |
| hsa-mir-676    | 1.855521166 | 0.000640764 |
| hsa-mir-6761   | 2.402607889 | 0.000515766 |
| hsa-mir-6767   | 2.970445329 | 3.81E-09    |
| hsa-mir-6769a  | 1.739748066 | 0.000985796 |
| hsa-mir-6773   | 2.198422563 | 1.06E-06    |
| hsa-mir-6776   | 3.495217128 | 1.19E-06    |
| hsa-mir-6781   | 1.756403678 | 0.000782407 |
| hsa-mir-6785   | 3.127668161 | 0.000152265 |
| hsa-mir-6786   | 2.923955516 | 0.00024818  |
| hsa-mir-6793   | 2.225851671 | 3.42E-05    |
| hsa-mir-6807   | 2.574678479 | 0.000540933 |
| hsa-mir-6808   | 1.917395711 | 0.000141641 |
| hsa-mir-6821   | 3.601222095 | 3.87E-06    |
| hsa-mir-6831   | 2.113002365 | 2.07E-05    |
| hsa-mir-6837   | 2.403644926 | 2.00E-06    |
| hsa-mir-6840   | 1.840469788 | 5.89E-05    |
| hsa-mir-6843   | 2.471175265 | 5.13E-05    |
| hsa-mir-6848   | 2.427075012 | 0.000429028 |
| hsa-mir-6852   | 1.995420524 | 8.58E-05    |
| hsa-mir-6853   | 2.158333672 | 0.001017968 |
| hsa-mir-6864   | 1.98351533  | 0.001103709 |
| hsa-mir-6874   | 1.885981164 | 0.00108663  |
| hsa-mir-6886   | 2.123283326 | 0.000745974 |
| hsa-mir-6889   | 2.22408091  | 1.36E-05    |
| hsa-mir-6893   | 3.256515128 | 3.88E-09    |
| hsa-mir-7113   | 2.362463541 | 9.48E-05    |
| hsa-mir-7153   | 2.288815828 | 0.000506221 |
| hsa-mir-7155   | 1.962283563 | 0.001007845 |
| hsa-mir-7160   | 2.440647435 | 0.000170712 |
| hsa-mir-762    | 2.120097057 | 1.84E-05    |
| hsa-mir-764    | 1.961246844 | 4.92E-05    |
| hsa-mir-7703   | 2.446347869 | 3.85E-05    |
| hsa-mir-7854   | 1.920012561 | 0.000146854 |
| hsa-mir-7973-1 | 1.713587637 | 4.14E-06    |
| hsa-mir-7973-2 | 1.713587637 | 4.14E-06    |
| hsa-mir-7975   | 2.227942146 | 3.98E-05    |
| hsa-mir-8061   | 2.021166642 | 0.000161938 |
| hsa-mir-8062   | 2.907060824 | 1.41E-09    |
| hsa-mir-8064   | 3.0537755   | 3.25E-07    |
| hsa-mir-8075   | 2.310386323 | 1.50E-06    |
| hsa-mir-8085   | 2.26778685  | 0.000368463 |
| hsa-mir-875    | 2.478719237 | 0.000382616 |
| hsa-mir-887    | 1.841793708 | 0.000541667 |
| hsa-mir-888    | 2.258840589 | 6.91E-05    |
| hsa-mir-92a-1  | 2.330384535 | 6.87E-06    |
| hsa-mir-92a-2  | 2.619610497 | 9.91E-09    |
| hsa-mir-92b    | 2.584835851 | 0.000126768 |
| hsa-mir-93     | 2.313381063 | 8.88E-05    |
| hsa-mir-936    | 1.983530575 | 0.00057995  |
| hsa-mir-941-1  | 1.958448749 | 2.23E-05    |
| hsa-mir-941-2  | 1.72392785  | 2.69E-05    |
| hsa-mir-941-3  | 1.72392785  | 2.69E-05    |
| hsa-mir-941-4  | 1.72392785  | 2.69E-05    |
| hsa-mir-98     | 2.510155579 | 0.000144878 |
| IFIT3          | 3.31636857  | 5.91E-07    |
| IFITM1         | 4.087462841 | 1.74E-05    |
| IFITM2         | 2.652076697 | 1.15E-05    |

|              |              |             |
|--------------|--------------|-------------|
| IFITM3       | 4.499838345  | 2.42E-51    |
| IFNA1        | 2.306683164  | 8.24E-18    |
| IFNA4        | 2.469085272  | 3.36E-05    |
| IFNLR1       | 3.816692787  | 0.000243751 |
| IGFN1        | 1.216839724  | 0.000469937 |
| IKZF5        | -1.679464892 | 0.000781248 |
| IRF2         | 3.748679288  | 1.84E-33    |
| IRF9         | 3.115477217  | 3.99E-14    |
| JKAMP        | 1.70453094   | 5.76E-05    |
| KAT6B        | -1.592996596 | 0.001228788 |
| KCNK2        | 2.214279581  | 1.75E-09    |
| KIF3B        | 1.618581509  | 2.46E-05    |
| LDHA         | 1.937029619  | 1.49E-07    |
| LGALS9C      | -1.490571604 | 0.00040653  |
| LILRB1       | -1.594165388 | 0.000177804 |
| LOC100507003 | 1.656404272  | 0.000406413 |
| LOC200726    | -2.418618652 | 0.000379082 |
| LRRC8A       | -1.593816945 | 0.000599693 |
| LY96         | 4.722881689  | 5.55E-29    |
| MAGEF1       | -2.103448328 | 0.000295851 |
| MET          | 3.716128463  | 2.40E-153   |
| MFSD1        | 1.362509195  | 0.001061633 |
| MRPL30       | -1.789286153 | 2.62E-06    |
| MX1          | 4.667009572  | 2.84E-66    |
| NEK5         | 2.25528567   | 0.000697987 |
| NFKBIA       | -2.073434651 | 4.66E-06    |
| NFKBID       | 2.095206425  | 1.72E-15    |
| NLRP6        | -2.67025501  | 0.000219377 |
| NLRP8        | 5.130222879  | 1.85E-55    |
| NOL9         | -1.728915709 | 0.000493413 |
| NOTO         | 1.422795231  | 0.000205277 |
| NR1H2        | 5.402826668  | 1.73E-16    |
| NTN1         | -2.003570247 | 2.38E-06    |
| NUP62        | -1.715644621 | 0.00013238  |
| OAS1         | 5.491853096  | 1.04E-27    |
| OAS2         | 6            | 2.10E-17    |
| OAS3         | 4.485426827  | 8.67E-20    |
| OR4F16       | 3.05137128   | 6.62E-178   |
| OR4F21       | 3.05137128   | 6.62E-178   |
| OR4F29       | 3.05137128   | 6.62E-178   |
| OR4F3        | 3.05137128   | 6.62E-178   |
| OR8H2        | 2.268337304  | 4.67E-13    |
| PLCG1        | -1.765946798 | 0.000658464 |
| PLCZ1        | 1.834632496  | 0.000126962 |
| PNPT1        | 3.557282956  | 1.09E-15    |
| PTOV1        | 1.503928034  | 0.000986122 |
| PTPN22       | 2.436784507  | 5.94E-19    |
| PYGO1        | 1.813248274  | 2.90E-06    |
| QTRTD1       | -1.666046251 | 6.13E-05    |
| RCSD1        | 2.334182221  | 2.90E-11    |
| RELA         | 3.323736504  | 1.14E-08    |
| RNASEH2A     | 1.43256484   | 0.000463371 |
| RORC         | 1.491369542  | 1.02E-05    |
| RPS4Y2       | 1.59183847   | 0.000153048 |
| RUNX1T1      | -1.682404707 | 0.00073392  |
| SACM1L       | 1.66594539   | 1.81E-06    |
| SERTAD4      | -2.033350311 | 3.02E-05    |
| SH3D21       | -2.320255724 | 0.000574129 |

|                |              |             |
|----------------|--------------|-------------|
| SIGLEC8        | 1.496879933  | 0.000841657 |
| SLC2A8         | -3.330059966 | 1.09E-07    |
| SLC7A11        | -1.803994971 | 0.00038486  |
| SPEN           | -2.242320892 | 4.46E-05    |
| STAT1          | 4.531381461  | 7.60E-07    |
| STAT2          | 4.107687869  | 9.20E-09    |
| TAF1L          | 1.583200423  | 2.71E-05    |
| TAP1           | 7.988684687  | 5.91E-08    |
| TDO2           | -1.911001838 | 0.000216932 |
| THOP1          | 2.368376515  | 9.01E-19    |
| TICAM1         | -2.597895443 | 0.000218753 |
| TINAG          | -2.3743306   | 0.000574913 |
| TLR10          | 2.974430861  | 3.51E-244   |
| TLR5           | -2.051023593 | 0.000260181 |
| TMEM167A       | -1.575694212 | 0.001197439 |
| TMEM48         | 1.595752728  | 0.000368374 |
| TNF            | -2.446077067 | 5.42E-08    |
| TOR4A          | -2.672730078 | 0.000122461 |
| TRAT1          | 1.907368774  | 3.56E-06    |
| TRIM22         | 4.301477045  | 3.06E-34    |
| TSHB           | -2.012948484 | 0.000701476 |
| TTYH2          | 1.656687794  | 0.000105852 |
| UBQLN1         | 4.993841022  | 3.36E-47    |
| VAX1           | -1.741161563 | 0.000696302 |
| VIP            | -2.111718055 | 0.000151257 |
| XAF1           | 3.839198232  | 4.31E-41    |
| XIRP2          | -2.32180315  | 0.000290226 |
| ZBTB9          | -1.716792135 | 0.000423235 |
| ZDHHC1         | -2.459644393 | 1.47E-05    |
| ZDHHC2         | -1.942785943 | 0.000226663 |
| ZNF267         | -2.09280184  | 0.000577893 |
| ZNF43          | -1.456487344 | 0.000528189 |
| ZNF507         | -1.940540362 | 0.001006836 |
| ZNF664-FAM101A | 1.416816859  | 0.001182165 |
| ZSCAN25        | -1.784811091 | 0.000948652 |

**Supplementary Table 2 Primers used in this study**

| <b>Primers used in two-step PCR for screening</b> |                                                                                                        |
|---------------------------------------------------|--------------------------------------------------------------------------------------------------------|
| v2Adaptor_F                                       | AATGGACTATCATATGCTTACCGTAACTTGAA<br>AGTATTTTCG                                                         |
| v2Adaptor_R                                       | TCTACTATTCTTTCCCCTGCACTGTTGTGGGC<br>GATGTGCGCTCTG                                                      |
| Illumina F-01                                     | AATGATACGGCGACCACCGAGATCTACACTCT<br>TTCCCTACACGACGCTCTTCCGATCTTAAGTA<br>GAGTCTTGTGGAAAGGACGAAACACCG    |
| Illumina R-01                                     | CAAGCAGAAGACGGCATAACGAGATAAGTAGA<br>GGTGACTGGAGTTCAGACGTGTGCTCTTCCG<br>ATCTTTCTACTATTCTTTCCCCTGCACTGT  |
| Illumina F-02                                     | AATGATACGGCGACCACCGAGATCTACACTCT<br>TTCCCTACACGACGCTCTTCCGATCTATACAC<br>GATCTCTTGTGGAAAGGACGAAACACCG   |
| Illumina R-02                                     | CAAGCAGAAGACGGCATAACGAGATACACGAT<br>CGTGACTGGAGTTCAGACGTGTGCTCTTCCG<br>ATCTATTCTACTATTCTTTCCCCTGCACTGT |
| <b>qPCR primers used in this study</b>            |                                                                                                        |
| IAV v-RNA-RT-F                                    | ATTTGCCTATGAGACCGATGCT                                                                                 |
| IAV v-RNA-RT-R                                    | AGGATGGGGGCTGTGACC                                                                                     |
| APOE-RT-H-F                                       | AAGTCTGGGATCCTTGAGTCC                                                                                  |
| APOE-RT-H-R                                       | AGGAATGTGACCAGCAACG                                                                                    |
| IAV M1 mRNA-RT-F                                  | AAGACCAATCCTGTCACCTCTGA                                                                                |
| IAV M1 mRNA-RT-R                                  | CAAAGCGTCTACGCTGCAGTCC                                                                                 |
| IAV NP mRNA-RT-F                                  | GATTGGTGGAAATTGGACGAT                                                                                  |
| IAV NP mRNA-RT-R                                  | AGAGCACCATTCTCTCTATT                                                                                   |
| HMGCR-RT-H-F                                      | GACGCAACCTTTATATCCGTTT                                                                                 |

|                                             |                                |
|---------------------------------------------|--------------------------------|
| <i>HMGCR</i> -RT-H-R                        | TTGAAAGTGCTTTCTCTGTACCC        |
| <i>LDLR</i> -RT-H-F                         | AGGTTGAAACGTTGCCTCAG           |
| <i>LDLR</i> -RT-H-R                         | TCGTTTCTTTCGCATCTGTC           |
| <i>CD36</i> -RT-H-F                         | TGGAACAGAGGCTGACAACCTT         |
| <i>CD36</i> -RT-H-R                         | TTGATTTTGATAGATATGGGATGC       |
| <i>DHCR24</i> -RT-H-F                       | CTACTACCACCGCCACACG            |
| <i>DHCR24</i> -RT-H-R                       | GTTGTTGCCAAAGGGGATAA           |
| <i>CH25H</i> -RT-H-F                        | CTTCGACATGGAGTTCTTCGT          |
| <i>CH25H</i> -RT-H-R                        | TGTGGAAGGTGCGGTACA             |
| <i>IFITM3</i> -RT-H-F                       | CGAAACTACTGGGGAAAGGGA          |
| <i>IFITM3</i> -RT-H-R                       | ATTCATGGTGTCCAGCGAAGA          |
| <i>MX1</i> -RT-H-F                          | GGTGGTGGTCCCCAGTAATG           |
| <i>MX1</i> -RT-H-R                          | ACCACGTCCACAACCTTGTCT          |
| <b>Primers used for APOE overexpression</b> |                                |
| <i>APOE</i> -F                              | AGTTAACCTCGAGGGATGAAGGTTCTGTGG |
| <i>APOE</i> -R                              | GACCAATTCGGCGCGTCAGTGATTGTCGCT |

**Supplementary Table 3 ShRNA sequence used in this study**

|                        |                                                                |
|------------------------|----------------------------------------------------------------|
| <i>APOE</i> -ShRNA-1F  | CCGGGACAATCACTGAACGCCGAAGCTCGAGCTTC<br>GGCGTTCAGTGATTGTCTTTTTG |
| <i>APOE</i> -ShRNA-1R  | AATTCAAAAAGACAATCACTGAACGCCGAAGCTCGA<br>GCTTCGGCGTTCAGTGATTGTC |
| <i>APOE</i> -ShRNA-2F  | CCGGACGAGACCATGAAGGAGTTGACTCGAGTCAA<br>CTCCTTCATGGTCTCGTTTTTTG |
| <i>APOE</i> -ShRNA-2R  | AATTCAAAAACGAGACCATGAAGGAGTTGACTCGA<br>GTCAACTCCTTCATGGTCTCGT  |
| <i>HMGCR</i> -ShRNA-1F | CCGGCCCTCGATGCTCTTGTGAATCTCGAGATTCA<br>ACAAGAGCATCGAGGGTTTTTG  |

|                         |                                                                 |
|-------------------------|-----------------------------------------------------------------|
| <i>HMGCR</i> -ShRNA-1R  | AATTCAAAAACCCTCGATGCTCTTGTTGAATCTCGA<br>GATTCAACAAGAGCATCGAGGG  |
| <i>HMGCR</i> -ShRNA-2F  | CCGGCCTGTATATTTACTTCCAGTTCTCGAGAACTG<br>GAAGTAAATATACAGGTTTTTG  |
| <i>HMGCR</i> -ShRNA-2R  | AATTCAAAAACCTGTATATTTACTTCCAGTTCTCGAG<br>AACTGGAAGTAAATATACAGG  |
| <i>IFITM3</i> -ShRNA-1F | CCGGCCTGTTCAACACCCTCTTCATCTCGAGATGAA<br>GAGGGTGTTGAACAGGTTTTTG  |
| <i>IFITM3</i> -ShRNA-1R | AATTCAAAAACCTGTTCAACACCCTCTTCATCTCGA<br>GATGAAGAGGGTGTTGAACAGG  |
| <i>IFITM3</i> -ShRNA-2F | CCGGGCTTCATAGCATTTCGCCTACTCTCGAGAGTA<br>GGCGAATGCTATGAAGCTTTTTG |
| <i>IFITM3</i> -ShRNA-2R | AATTCAAAAAGCTTCATAGCATTTCGCCTACTCTCGA<br>GAGTAGGCGAATGCTATGAAGC |
| <i>MX1</i> -ShRNA-1F    | CCGGCCTCTATTACTGAATGGAGATCTCGAGATCTC<br>CATTCAAGTAATAGAGGTTTTTG |
| <i>MX1</i> -ShRNA-1R    | AATTCAAAAACCTCTATTACTGAATGGAGATCTCGA<br>GATCTCCATTCAAGTAATAGAGG |
| <i>MX1</i> -ShRNA-2F    | CCGGCCACAAATGGAGTACAATAATCTCGAGATTAT<br>TGTAATCCATTTGTGGTTTTTG  |
| <i>MX1</i> -ShRNA-2R    | AATTCAAAAACCACAAATGGAGTACAATAATCTCGA<br>GATTATTGTAATCCATTTGTGG  |

**Supplementary Table 4 SgRNA sequence used in this study**

|                    |                           |
|--------------------|---------------------------|
| <i>APOE</i> -Sg-1F | CACCGTGCGTTGCTGGTCACATTCC |
| <i>APOE</i> -Sg-1R | AAACGGAATGTGACCAGCAACGCAC |
| <i>APOE</i> -Sg-2F | CACCGACAGTGTCTGCACCCAGCGC |
| <i>APOE</i> -Sg-2R | AAACGCGCTGGGTGCAGACACTGTC |
